# Supplementary material for: CO2/N2 Separation Properties of Polyimide-Based Mixed-Matrix Membranes Comprising UiO-66 with Various Functionalities
Source: PubMed Central journal article supplement (PMC7407110; doi:10.3390/membranes10070154), 2020-07-17
Supplement: membranes-10-00154-s001.pdf [file membranes-10-00154-s001.pdf]

# Supplementary Information

for

## **CO<sub>2</sub>/N<sub>2</sub> separation properties of polyimide-based composite membranes comprising UiO-66 with various functionalities**

Chong Yang Chuah<sup>1</sup>, Junghyun Lee<sup>2</sup>, Juha Song<sup>2</sup>, and Tae-Hyun Bae<sup>3,\*</sup>

<sup>1</sup> Singapore Membrane Technology Centre, Nanyang Environment and Water Research Institute, Nanyang Technological University, Singapore 637141, Singapore

<sup>2</sup> School of Chemical and Biomedical Engineering, Nanyang Technological University, Singapore 637459, Singapore

<sup>3</sup> Department of Chemical and Biomolecular Engineering, Korea Advanced Institute of Science and Technology, Daejeon 31414, Republic of Korea

\* Corresponding author

E-mail: thbae@kaist.ac.kr

**Table S1** Elemental Analysis of UiO-66 and its derivative

| Sample                   | C (%) | H (%) | N (%) | Br (%) <sup>[a]</sup> |
|--------------------------|-------|-------|-------|-----------------------|
| UiO-66                   | 29.75 | 2.121 | 0.899 | -                     |
| UiO-66-NH <sub>2</sub>   | 28.76 | 2.833 | 3.845 | -                     |
| UiO-66-Br                | 22.93 | 1.772 | 0.259 | 9.262                 |
| UiO-66-(OH) <sub>2</sub> | 28.77 | 1.811 | 1.834 | -                     |

<sup>[a]</sup> Estimated from EDX analysis (Figure S1)

**Table S2** Theoretical amount of UiO-66 and its derivative<sup>(a)</sup>

| Sample <sup>(b)</sup>    | M <sub>w</sub> (g/mol) | Zr (%) | C (%) | H (%) | O (%) | N (%) | Br (%) |
|--------------------------|------------------------|--------|-------|-------|-------|-------|--------|
| UiO-66                   | 1664.1                 | 32.89  | 34.64 | 1.695 | 30.77 | 0     | 0      |
| UiO-66-NH <sub>2</sub>   | 1712.1                 | 31.96  | 33.67 | 1.413 | 28.03 | 4.91  | 0      |
| UiO-66-Br                | 2137.4                 | 25.61  | 26.97 | 1.037 | 23.95 | 0     | 22.43  |
| UiO-66-(OH) <sub>2</sub> | 1856.0                 | 29.48  | 31.06 | 1.520 | 37.93 | 0     | 0      |

<sup>(a)</sup> Due to the potential presence of residual solvents or water in MOF, it is possible that the deviation between experimental and theoretical value can be observed. Nevertheless, the trend in C(%), H(%), N(%) are generally consistent across all UiO-66 framework.

<sup>(b)</sup> Molecular formula: Zr<sub>6</sub>C<sub>48</sub>H<sub>28</sub>O<sub>32</sub> (UiO-66); Zr<sub>6</sub>C<sub>48</sub>H<sub>24</sub>O<sub>30</sub>N<sub>6</sub> (UiO-66-NH<sub>2</sub>); Zr<sub>6</sub>C<sub>48</sub>H<sub>22</sub>O<sub>32</sub>Br<sub>6</sub> (UiO-66-Br); Zr<sub>6</sub>C<sub>48</sub>H<sub>28</sub>O<sub>44</sub> (UiO-66-(OH)<sub>2</sub>)

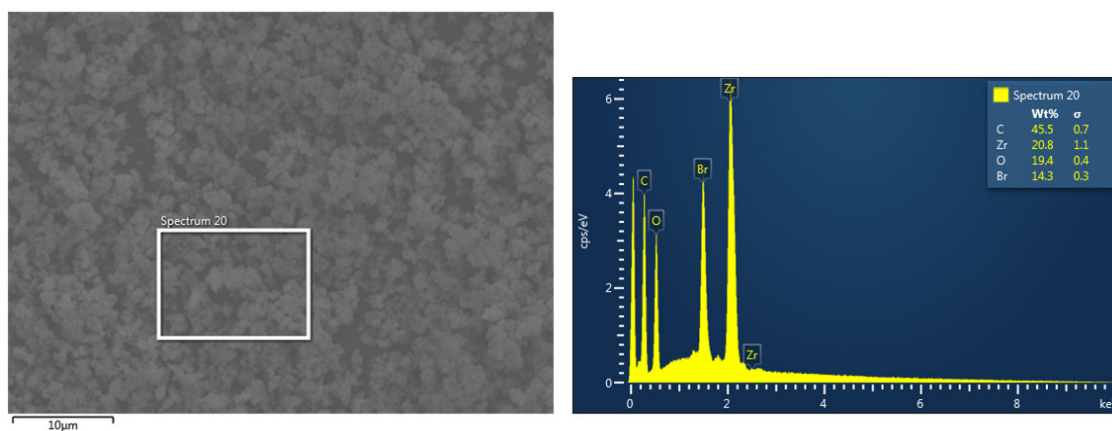**Figure S1** EDX analysis of UiO-66-Br

**Table S3** Fitting Parameters for CO<sub>2</sub> and N<sub>2</sub> for UiO-66 and its derivative at 25 °CUnit of P = bar; Unit of  $q$  = mmol/g

$$q = \frac{q_{sat}bp}{1 + bp}$$

| Sample                   | gas             | $q_{sat}$ (bar) | $b$ (bar <sup>-1</sup> ) | R <sup>2</sup> value |
|--------------------------|-----------------|-----------------|--------------------------|----------------------|
| UiO-66                   | CO <sub>2</sub> | 6.119           | 0.2734                   | 1                    |
|                          | N <sub>2</sub>  | 6.119           | 0.01543                  | 0.992                |
| UiO-66-NH <sub>2</sub>   | CO <sub>2</sub> | 5.376           | 0.359                    | 0.9998               |
|                          | N <sub>2</sub>  | 5.376           | 0.01673                  | 0.964                |
| UiO-66-Br                | CO <sub>2</sub> | 3.302           | 0.837                    | 0.9998               |
|                          | N <sub>2</sub>  | 3.302           | 0.03773                  | 0.9972               |
| UiO-66-(OH) <sub>2</sub> | CO <sub>2</sub> | 2.151           | 1.040                    | 0.9996               |
|                          | N <sub>2</sub>  | 2.151           | 0.0271                   | 0.9889               |

**Table S4** Fitting Parameters for CO<sub>2</sub> and N<sub>2</sub> for UiO-66 and its derivative at 35 °CUnit of P = bar; Unit of  $q$  = mmol/g

$$q = \frac{q_{sat}bp}{1 + bp}$$

| <b>Sample</b>                  | <b>gas</b>      | <b><math>q_{sat}</math> (bar)</b> | <b><math>b</math> (bar<sup>-1</sup>)</b> | <b>R<sup>2</sup> value</b> |
|--------------------------------|-----------------|-----------------------------------|------------------------------------------|----------------------------|
| <b>UiO-66</b>                  | CO <sub>2</sub> | 5.404                             | 0.2357                                   | 0.9998                     |
|                                | N <sub>2</sub>  | 5.404                             | 0.01432                                  | 0.9894                     |
| <b>UiO-66-NH<sub>2</sub></b>   | CO <sub>2</sub> | 5.528                             | 0.2526                                   | 0.9996                     |
|                                | N <sub>2</sub>  | 5.528                             | 0.01228                                  | 0.9818                     |
| <b>UiO-66-Br</b>               | CO <sub>2</sub> | 3.405                             | 0.5721                                   | 0.9995                     |
|                                | N <sub>2</sub>  | 3.405                             | 0.02908                                  | 0.9947                     |
| <b>UiO-66-(OH)<sub>2</sub></b> | CO <sub>2</sub> | 2.065                             | 0.7765                                   | 0.9994                     |
|                                | N <sub>2</sub>  | 2.065                             | 0.02145                                  | 0.9800                     |

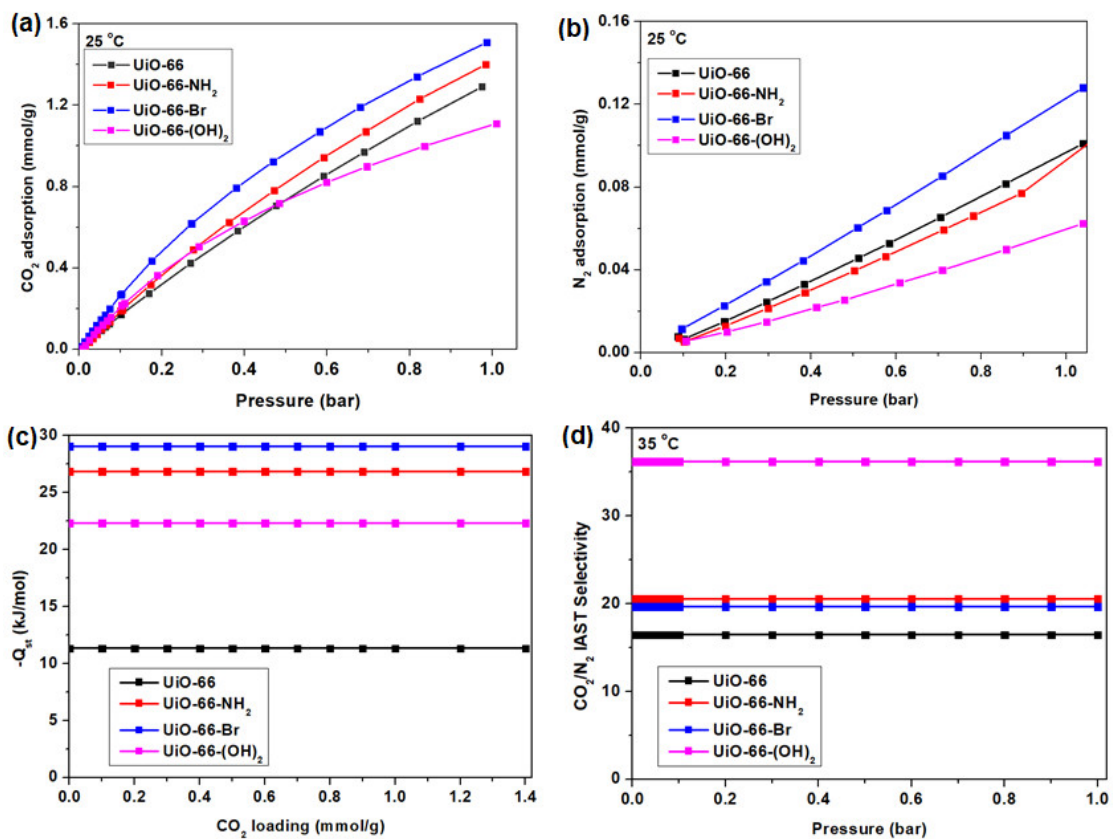

**Figure S2** (a) CO<sub>2</sub> adsorption at 25 °C; (b) N<sub>2</sub> adsorption at 25 °C; (c) Isothermic heat of adsorption of CO<sub>2</sub> and (d) CO<sub>2</sub>/N<sub>2</sub> IAST selectivity (feed mixture of CO<sub>2</sub>/N<sub>2</sub> = 20/80) of for UiO-66, UiO-66-NH<sub>2</sub>, UiO-66-Br and UiO-66-(OH)<sub>2</sub>

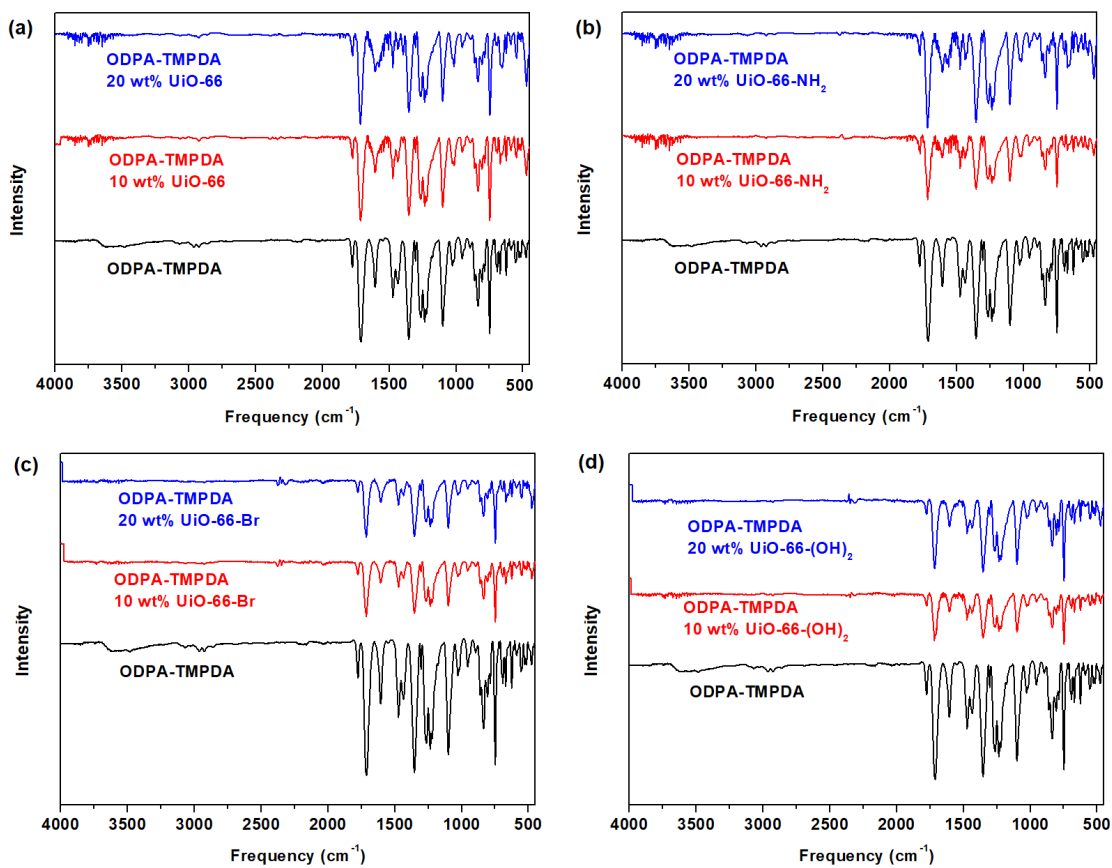

Figure S3 FT-IR spectrum of mixed-matrix membrane

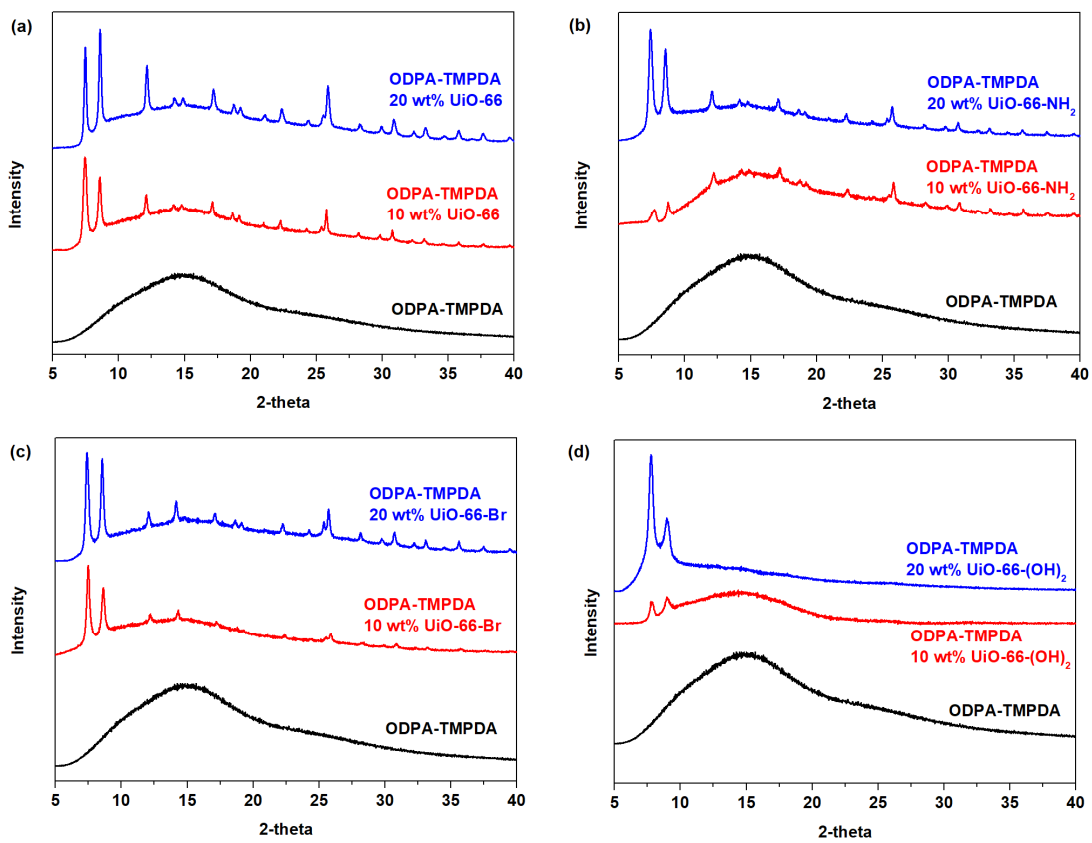

Figure S4 XRD analysis of mixed-matrix membrane

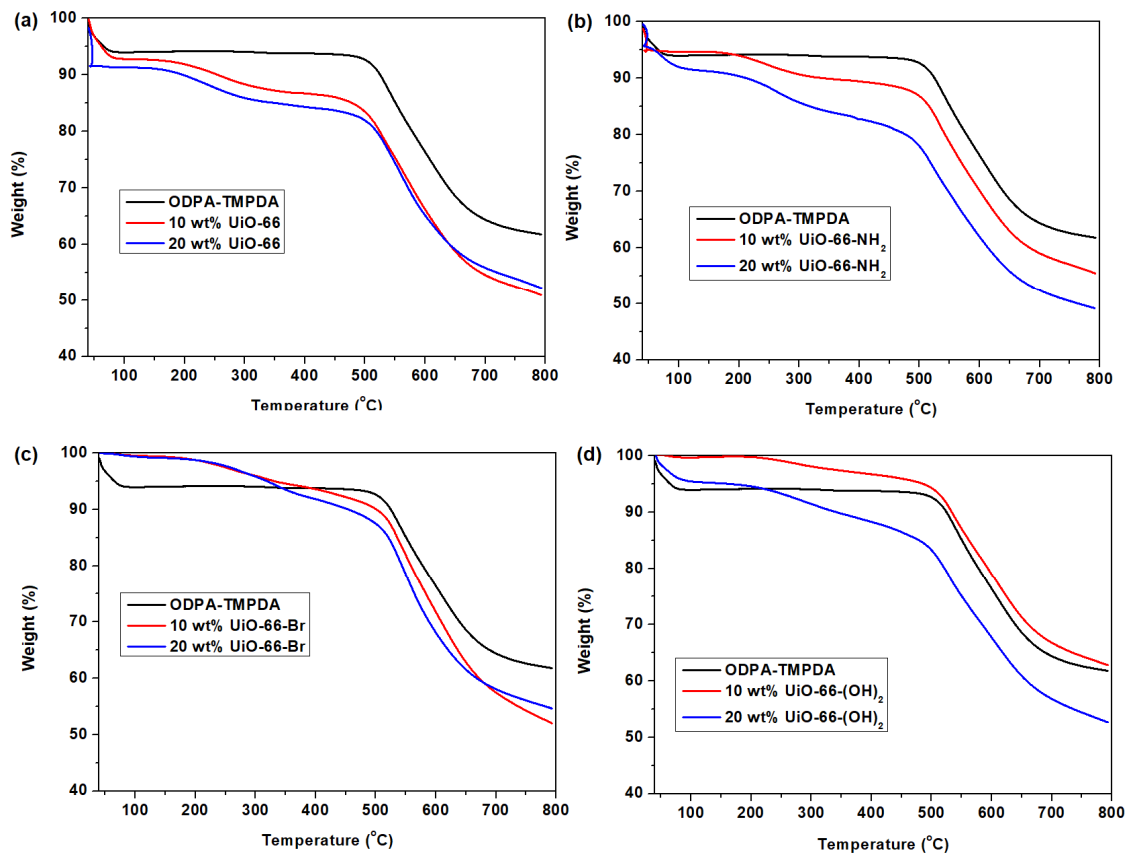

Figure S5 TGA analysis of mixed-matrix membrane



**Table S5** Fitting Parameters for CO<sub>2</sub> and N<sub>2</sub> for polymeric and mixed-matrix membranes at 35 °C

Unit of P = bar; Unit of  $q$  = mmol/g

$$q = \frac{q_{sat}bp}{1 + bp}$$

| Sample                          | gas             | $q_{sat}$ (bar) | $b$ (bar <sup>-1</sup> ) | R <sup>2</sup> value |
|---------------------------------|-----------------|-----------------|--------------------------|----------------------|
| ODPA-TMPDA                      | CO <sub>2</sub> | 1.444           | 0.9832                   | 0.9996               |
|                                 | N <sub>2</sub>  | 1.017           | 0.02502                  | 0.9862               |
| 20 wt% UiO-66                   | CO <sub>2</sub> | 1.611           | 0.6785                   | 0.9999               |
|                                 | N <sub>2</sub>  | 0.5807          | 0.04649                  | 0.9778               |
| 20 wt% UiO-66-NH <sub>2</sub>   | CO <sub>2</sub> | 1.446           | 0.6945                   | 0.9999               |
|                                 | N <sub>2</sub>  | 0.1717          | 0.1365                   | 0.9869               |
| 20 wt% UiO-66-Br                | CO <sub>2</sub> | 1.381           | 0.7766                   | 0.9999               |
|                                 | N <sub>2</sub>  | 1.471           | 0.01143                  | 0.9451               |
| 20 wt% UiO-66-(OH) <sub>2</sub> | CO <sub>2</sub> | 1.373           | 0.8565                   | 0.9998               |
|                                 | N <sub>2</sub>  | 4.263           | 0.005002                 | 0.9847               |

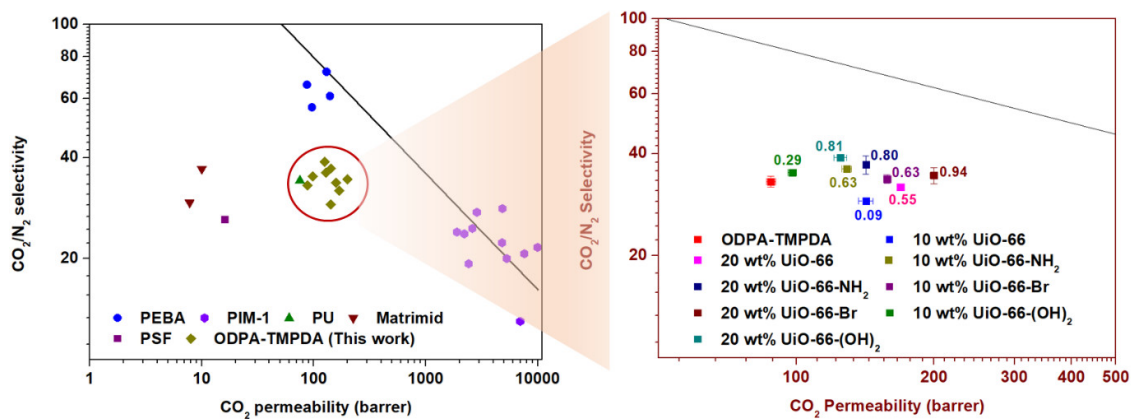

**Figure S6** Comparison of the gas permeation data with the upper bound limit for CO<sub>2</sub>/N<sub>2</sub> constructed in 2008. The numerical number indicated in the figure illustrate the value of  $F_{index}$  as described in Section 2.4.5. The data used in this plot is provided in **Table 4**.
